# Supplementary material
Source: PubMed Central journal article supplement (PMC8404987)
Supplement: mmc3.pdf [file mmc3.pdf]

## Routinedaten SARS-CoV 2

Liebe Kolleginnen und Kollegen,

die Mehrheit der Patienten in Deutschland, die mit dem neuen Corona-Virus infiziert sind, wird hausärztlich behandelt. Allerdings sind Daten dieser Routineversorgung kaum sichtbar. Das möchten wir vom Institut für Allgemeinmedizin in Lübeck gerne ändern.

Daher bitten wir Sie, falls Sie einen Patienten/mehrere Patienten mit SARS-CoV-2 Infektion im März behandelt haben, uns folgende Fragen anonym zu beantworten.

Die Dauer für das Ausfüllen des Fragebogens ist davon abhängig, wie viele Patienten mit dieser Erkrankung Sie versorgen. Ggf. können Sie gerne Herrn Dr. Strumann (s.u.) kontaktieren, um Alternativen der Datenübermittlung zu besprechen, falls Sie die Daten von mehr als zehn Patienten zur Verfügung stellen wollen.

Die Befragung erfolgt anonym, ein positives Votum der Ethikkommission der Universität zu Lübeck diese Routinedaten auswerten zu dürfen, liegt vor.

Falls Sie an möglicherweise aus den Daten resultierende Publikationen interessiert sind, schreiben Sie bitte eine Mail an: [c.strumann@uni-luebeck.de](mailto:c.strumann@uni-luebeck.de).

Mit besten Grüßen

Prof. Dr. med Jost Steinhäuser, Institut für Allgemeinmedizin, Lübeck

### Angaben zu Ihrer Person und der Praxis, in der Sie arbeiten

#### 1. Ihr Alter

- bis 40 Jahre  
 40-65 Jahre  
 über 65 Jahre

#### 2. Ihr Geschlecht

- weiblich  
 männlich  
 divers

#### 3. Bundesland in dem Ihre Praxis liegt

#### 4. Liegt die Praxis im

- ländlichen Raum  
 städtischen Raum  
 weiß nicht

5. Wie viel Zeit haben Sie durchschnittlich am Tag aus ärztlicher Sicht für die Versorgung von Patienten mit SARS-CoV-2 Infektion verwendet?

6. Wie viel Zeit haben Sie durchschnittlich am Tag aus ärztlicher Sicht für die Beratung von Patienten zum Thema SARS-CoV-2 Infektion verwendet?

7. Wie viel Zeit haben die Medizinischen Fachangestellten insgesamt (d.h. alle MFAs zusammen) durchschnittlich in Ihrer Praxis am Tag für die Versorgung von Patienten mit SARS-CoV-2 Infektion verwendet?

8. Wie viel Zeit haben die Medizinischen Fachangestellten insgesamt (d.h. alle MFAs zusammen) durchschnittlich in Ihrer Praxis am Tag für die Beratung von Patienten zum Thema SARS-CoV-2 Infektion verwendet?

9. Wie viele Fälle mit SARS-CoV-2 haben Sie bisher betreut?

10. Wie haben Sie Kontakt zu den Patienten mit einer SARS-CoV-2 Infektion gehalten?  
(Mehrfachantworten möglich)

Telefon

Hausbesuch

Videosprechstunde

Einbestellung in die Praxis

Sonstiges (bitte angeben)

11. Hatten Sie in den letzten vier Wochen ausreichend Schutzbekleidung?

Ja

Nein

12. Hatte ein Mitarbeiter Ihrer Praxis eine SARS-CoV-2 Infektion?

Ja

Nein

13. Wie viele telefonischen Arbeitsunfähigkeitsbescheinigungen haben Sie in etwa ausgestellt?

14. Wie sind Ihre Erfahrungen mit der telefonischen Arbeitsunfähigkeitsbescheinigung für 14 Tage?

- sehr gut, sollte beibehalten bleiben
- gut
- neutral
- schlecht
- sehr schlecht, das gefährdet die Gesundheit meiner Patienten
- hatte bisher keinen solchen Fall

15. Wie beurteilen Sie die Kommunikation mit folgenden Einrichtungen in den letzten vier Wochen bezüglich SARS-CoV-2?

|                                  | sehr gut              | gut                   | neutral               | schlecht              | sehr schlecht         | kann ich nicht beurteilen |
|----------------------------------|-----------------------|-----------------------|-----------------------|-----------------------|-----------------------|---------------------------|
| Kassenärztliche Vereinigung (KV) | <input type="radio"/>     |
| Gesundheitsamt                   | <input type="radio"/>     |
| Kommunale Ebene                  | <input type="radio"/>     |

**Angaben zu Ihrem Patienten**

16. Geburtsjahr des Patienten

17. Geschlecht

- weiblich
- männlich
- divers

**Beschwerdebild**

18. Welche der folgenden Symptome hat der Patient gezeigt? (Mehrfachantworten möglich)

- Plötzlicher Krankheitsbeginn
- Akute Luftnot in Ruhe
- Akute Luftnot bei Belastung
- Schmerzen in der Brust
- Fieber
- Abgeschlagenheit
- Husten
- Gliederschmerzen
- Sonstiges (bitte angeben)
- Halsschmerzen / -kratzen
- Schnupfen
- Kopfschmerzen
- Durchfall
- Geschmack verändert
- Geruch verändert
- keine

19. Wann traten die ersten Symptome auf?

- bisher keine Symptome
- am Tag der Konsultation
- einen Tag vor der Konsultation
- 2-3 Tage vor der Konsultation
- 4-7 Tage vor der Konsultation
- eine Woche und länger vor der Konsultation
- weiß nicht

20. Hatte der Patient eine Röntgendiagnostik des Thorax?

- Ja
- Nein

21. Falls ja, wurden Infiltrate diagnostiziert?

- Ja
- Nein

22. Risikofaktoren (Mehrfachantworten möglich)

- Raucher
- aufgrund einer Erkrankung/Therapie geschwächtes Immunsystem
- Asthma
- COPD
- sonstige chronische Erkrankung, und zwar
- Malignom
- Bluthochdruck
- Diabetes

**Therapie & Verlauf**

Bitte kreuzen Sie alle im Verlauf der Erkrankung zutreffenden Ereignisse (bis zum heutigen Tag) an.

23. Therapie, bis zum heutigen Tag (Mehrfachantworten möglich)

- symptomatisch
- Antibiotika: Amoxicillin/Clavulansäure
- Antibiotika: Azithromycin
- Antibiotika: sonstige
- stationäre Einweisung
- Sonstiges (bitte angeben)

24. Verlauf, bis zum heutigen Tag (Mehrfachantworten möglich)

- noch unter Monitoring
- stationär auf Normalstation
- stationär auf Intensivstation
- invasive Beatmung
- verstorben
- unbekannt
- gesund aus Quarantäne entlassen
- Sonstiges (bitte angeben)

**Laboruntersuchungen**

Bitte beziehen Sie sich stets auf die ersten Laborwerte innerhalb der Episode.

25. Wurde die Diagnose mittels eines PCR Tests bestätigt?

- Ja
- Nein
- unbekannt

26. In welchen Abständen wurden ggf. die PCR-Tests wiederholt?(in Tagen)

27. Antikörpertest

|                        | positiv               | negativ               | nicht getestet        |
|------------------------|-----------------------|-----------------------|-----------------------|
| Immunglobulin A (IgA)  | <input type="radio"/> | <input type="radio"/> | <input type="radio"/> |
| Immunglobuline G (IgG) | <input type="radio"/> | <input type="radio"/> | <input type="radio"/> |
| Immunglobulin M (IgM)  | <input type="radio"/> | <input type="radio"/> | <input type="radio"/> |

## 28. weitere Laborwerte

|                                   | erniedrigt            | Normbereich           | erhöht                | nicht getestet        |
|-----------------------------------|-----------------------|-----------------------|-----------------------|-----------------------|
| Leukozyten (leuk)                 | <input type="radio"/> | <input type="radio"/> | <input type="radio"/> | <input type="radio"/> |
| Eosinophile Granulozyten (eos)    | <input type="radio"/> | <input type="radio"/> | <input type="radio"/> | <input type="radio"/> |
| Hämoglobin (hb)                   | <input type="radio"/> | <input type="radio"/> | <input type="radio"/> | <input type="radio"/> |
| Hämatokrit (hkt)                  | <input type="radio"/> | <input type="radio"/> | <input type="radio"/> | <input type="radio"/> |
| Thrombozyten (thro)               | <input type="radio"/> | <input type="radio"/> | <input type="radio"/> | <input type="radio"/> |
| C-reaktives Protein (crp)         | <input type="radio"/> | <input type="radio"/> | <input type="radio"/> | <input type="radio"/> |
| Kreatinin (krea)                  | <input type="radio"/> | <input type="radio"/> | <input type="radio"/> | <input type="radio"/> |
| Glutamatpyruvattransaminase (gpt) | <input type="radio"/> | <input type="radio"/> | <input type="radio"/> | <input type="radio"/> |
| Gamma-GT (ggt)                    | <input type="radio"/> | <input type="radio"/> | <input type="radio"/> | <input type="radio"/> |
| Laktatdehydrogenase (ldh)         | <input type="radio"/> | <input type="radio"/> | <input type="radio"/> | <input type="radio"/> |
| Ferritin (ferr)                   | <input type="radio"/> | <input type="radio"/> | <input type="radio"/> | <input type="radio"/> |
| Kardiale Troponine (tnt)          | <input type="radio"/> | <input type="radio"/> | <input type="radio"/> | <input type="radio"/> |
| D-Dimer                           | <input type="radio"/> | <input type="radio"/> | <input type="radio"/> | <input type="radio"/> |

### Weitere Patienten

29. Haben Sie noch einen weiteren Patienten mit einer SARS-CoV-2 Infektion behandelt?

- Ja  
 Nein

Angaben zu Ihrem 2. Patient

30. Geburtsjahr des Patienten

31. Geschlecht

- weiblich  
 männlich  
 divers

**Beschwerdebild**

32. Welche der folgenden Symptome hat der Patient gezeigt? (Mehrfachantworten möglich)

- |                                                       |                                                   |
|-------------------------------------------------------|---------------------------------------------------|
| <input type="checkbox"/> Plötzlicher Krankheitsbeginn | <input type="checkbox"/> Halsschmerzen / -kratzen |
| <input type="checkbox"/> Akute Luftnot in Ruhe        | <input type="checkbox"/> Schnupfen                |
| <input type="checkbox"/> Akute Luftnot bei Belastung  | <input type="checkbox"/> Kopfschmerzen            |
| <input type="checkbox"/> Schmerzen in der Brust       | <input type="checkbox"/> Durchfall                |
| <input type="checkbox"/> Fieber                       | <input type="checkbox"/> Geschmack verändert      |
| <input type="checkbox"/> Abgeschlagenheit             | <input type="checkbox"/> Geruch verändert         |
| <input type="checkbox"/> Husten                       | <input type="checkbox"/> keine                    |
| <input type="checkbox"/> Gliederschmerzen             |                                                   |
| <input type="checkbox"/> Sonstiges (bitte angeben)    |                                                   |

33. Wann traten die ersten Symptome auf?

- |                                                      |                                                                  |
|------------------------------------------------------|------------------------------------------------------------------|
| <input type="radio"/> bisher keine Symptome          | <input type="radio"/> 4-7 Tage vor der Konsultation              |
| <input type="radio"/> am Tag der Konsultation        | <input type="radio"/> eine Woche und länger vor der Konsultation |
| <input type="radio"/> einen Tag vor der Konsultation | <input type="radio"/> weiß nicht                                 |
| <input type="radio"/> 2-3 Tage vor der Konsultation  |                                                                  |

34. Hatte der Patient eine Röntgendiagnostik des Thorax?

- Ja  
 Nein

35. Falls ja, wurden Infiltrate diagnostiziert?

- Ja  
 Nein

36. Risikofaktoren (Mehrfachantworten möglich)

- |                                                                                      |                                        |
|--------------------------------------------------------------------------------------|----------------------------------------|
| <input type="checkbox"/> Raucher                                                     | <input type="checkbox"/> Malignom      |
| <input type="checkbox"/> aufgrund einer Erkrankung/Therapie geschwächtes Immunsystem | <input type="checkbox"/> Bluthochdruck |
| <input type="checkbox"/> Asthma                                                      | <input type="checkbox"/> Diabetes      |
| <input type="checkbox"/> COPD                                                        |                                        |
| <input type="checkbox"/> sonstige chronische Erkrankung, und zwar                    |                                        |

**Therapie & Verlauf**

Bitte kreuzen Sie alle im Verlauf der Erkrankung zutreffenden Ereignisse (bis zum heutigen Tag) an.

37. Therapie, bis zum heutigen Tag (Mehrfachantworten möglich)

- symptomatisch  
 Antibiotika: Amoxicillin/Clavulansäure  
 Antibiotika: Azithromycin  
 Antibiotika: sonstige  
 stationäre Einweisung  
 Sonstiges (bitte angeben)

38. Verlauf, bis zum heutigen Tag (Mehrfachantworten möglich)

- noch unter Monitoring  
 stationär auf Normalstation  
 stationär auf Intensivstation  
 invasive Beatmung  
 verstorben  
 unbekannt  
 gesund aus Quarantäne entlassen  
 Sonstiges (bitte angeben)

**Laboruntersuchungen**

Bitte beziehen Sie sich stets auf die ersten Laborwerte innerhalb der Episode.



39. Wurde die Diagnose mittels eines PCR Tests bestätigt?

- Ja  
 Nein  
 unbekannt

40. In welchen Abständen wurden ggf. die PCR-Tests wiederholt?(in Tagen)

41. Antikörpertest

|                        | positiv               | negativ               | nicht getestet        |
|------------------------|-----------------------|-----------------------|-----------------------|
| Immunglobulin A (IgA)  | <input type="radio"/> | <input type="radio"/> | <input type="radio"/> |
| Immunglobuline G (IgG) | <input type="radio"/> | <input type="radio"/> | <input type="radio"/> |
| Immunglobulin M (IgM)  | <input type="radio"/> | <input type="radio"/> | <input type="radio"/> |

42. weitere Laborwerte

|                                   | erniedrigt            | Normbereich           | erhöht                | nicht getestet        |
|-----------------------------------|-----------------------|-----------------------|-----------------------|-----------------------|
| Leukozyten (leuk)                 | <input type="radio"/> | <input type="radio"/> | <input type="radio"/> | <input type="radio"/> |
| Eosinophile Granulozyten (eos)    | <input type="radio"/> | <input type="radio"/> | <input type="radio"/> | <input type="radio"/> |
| Hämoglobin (hb)                   | <input type="radio"/> | <input type="radio"/> | <input type="radio"/> | <input type="radio"/> |
| Hämatokrit (hkt)                  | <input type="radio"/> | <input type="radio"/> | <input type="radio"/> | <input type="radio"/> |
| Thrombozyten (thro)               | <input type="radio"/> | <input type="radio"/> | <input type="radio"/> | <input type="radio"/> |
| C-reaktives Protein (crp)         | <input type="radio"/> | <input type="radio"/> | <input type="radio"/> | <input type="radio"/> |
| Kreatinin (krea)                  | <input type="radio"/> | <input type="radio"/> | <input type="radio"/> | <input type="radio"/> |
| Glutamatpyruvattransaminase (gpt) | <input type="radio"/> | <input type="radio"/> | <input type="radio"/> | <input type="radio"/> |
| Gamma-GT (ggt)                    | <input type="radio"/> | <input type="radio"/> | <input type="radio"/> | <input type="radio"/> |
| Laktatdehydrogenase (ldh)         | <input type="radio"/> | <input type="radio"/> | <input type="radio"/> | <input type="radio"/> |
| Ferritin (ferr)                   | <input type="radio"/> | <input type="radio"/> | <input type="radio"/> | <input type="radio"/> |
| Kardiale Troponine (tnt)          | <input type="radio"/> | <input type="radio"/> | <input type="radio"/> | <input type="radio"/> |
| D-Dimer                           | <input type="radio"/> | <input type="radio"/> | <input type="radio"/> | <input type="radio"/> |

Weitere Patienten

43. Haben Sie noch einen weiteren Patienten mit einer SARS-CoV-2 Infektion behandelt?

- Ja  
 Nein

Angaben zu Ihrem 3. Patient

44. Geburtsjahr des Patienten

45. Geschlecht

- weiblich  
 männlich  
 divers

**Beschwerdebild**

46. Welche der folgenden Symptome hat der Patient gezeigt? (Mehrfachantworten möglich)

- |                                                       |                                                   |
|-------------------------------------------------------|---------------------------------------------------|
| <input type="checkbox"/> Plötzlicher Krankheitsbeginn | <input type="checkbox"/> Halsschmerzen / -kratzen |
| <input type="checkbox"/> Akute Luftnot in Ruhe        | <input type="checkbox"/> Schnupfen                |
| <input type="checkbox"/> Akute Luftnot bei Belastung  | <input type="checkbox"/> Kopfschmerzen            |
| <input type="checkbox"/> Schmerzen in der Brust       | <input type="checkbox"/> Durchfall                |
| <input type="checkbox"/> Fieber                       | <input type="checkbox"/> Geschmack verändert      |
| <input type="checkbox"/> Abgeschlagenheit             | <input type="checkbox"/> Geruch verändert         |
| <input type="checkbox"/> Husten                       | <input type="checkbox"/> keine                    |
| <input type="checkbox"/> Gliederschmerzen             |                                                   |
| <input type="checkbox"/> Sonstiges (bitte angeben)    |                                                   |

47. Wann traten die ersten Symptome auf?

- |                                                      |                                                                  |
|------------------------------------------------------|------------------------------------------------------------------|
| <input type="radio"/> bisher keine Symptome          | <input type="radio"/> 4-7 Tage vor der Konsultation              |
| <input type="radio"/> am Tag der Konsultation        | <input type="radio"/> eine Woche und länger vor der Konsultation |
| <input type="radio"/> einen Tag vor der Konsultation | <input type="radio"/> weiß nicht                                 |
| <input type="radio"/> 2-3 Tage vor der Konsultation  |                                                                  |

48. Hatte der Patient eine Röntgendiagnostik des Thorax?

- Ja  
 Nein

49. Falls ja, wurden Infiltrate diagnostiziert?

- Ja  
 Nein

50. Risikofaktoren (Mehrfachantworten möglich)

- |                                                                                      |                                        |
|--------------------------------------------------------------------------------------|----------------------------------------|
| <input type="checkbox"/> Raucher                                                     | <input type="checkbox"/> Malignom      |
| <input type="checkbox"/> aufgrund einer Erkrankung/Therapie geschwächtes Immunsystem | <input type="checkbox"/> Bluthochdruck |
| <input type="checkbox"/> Asthma                                                      | <input type="checkbox"/> Diabetes      |
| <input type="checkbox"/> COPD                                                        |                                        |
| <input type="checkbox"/> sonstige chronische Erkrankung, und zwar                    |                                        |

**Therapie & Verlauf**

Bitte kreuzen Sie alle im Verlauf der Erkrankung zutreffenden Ereignisse (bis zum heutigen Tag) an.

51. Therapie, bis zum heutigen Tag (Mehrfachantworten möglich)

- symptomatisch  
 Antibiotika: Amoxicillin/Clavulansäure  
 Antibiotika: Azithromycin  
 Antibiotika: sonstige  
 stationäre Einweisung  
 Sonstiges (bitte angeben)

52. Verlauf, bis zum heutigen Tag (Mehrfachantworten möglich)

- noch unter Monitoring  
 stationär auf Normalstation  
 stationär auf Intensivstation  
 invasive Beatmung  
 verstorben  
 unbekannt  
 gesund aus Quarantäne entlassen  
 Sonstiges (bitte angeben)

**Laboruntersuchungen**

Bitte beziehen Sie sich stets auf die ersten Laborwerte innerhalb der Episode.

53. Wurde die Diagnose mittels eines PCR Tests bestätigt?

- Ja  
 Nein  
 unbekannt

54. In welchen Abständen wurden ggf. die PCR-Tests wiederholt?(in Tagen)

55. Antikörpertest

|                        | positiv               | negativ               | nicht getestet        |
|------------------------|-----------------------|-----------------------|-----------------------|
| Immunglobulin A (IgA)  | <input type="radio"/> | <input type="radio"/> | <input type="radio"/> |
| Immunglobuline G (IgG) | <input type="radio"/> | <input type="radio"/> | <input type="radio"/> |
| Immunglobulin M (IgM)  | <input type="radio"/> | <input type="radio"/> | <input type="radio"/> |

56. weitere Laborwerte

|                                   | erniedrigt            | Normbereich           | erhöht                | nicht getestet        |
|-----------------------------------|-----------------------|-----------------------|-----------------------|-----------------------|
| Leukozyten (leuk)                 | <input type="radio"/> | <input type="radio"/> | <input type="radio"/> | <input type="radio"/> |
| Eosinophile Granulozyten (eos)    | <input type="radio"/> | <input type="radio"/> | <input type="radio"/> | <input type="radio"/> |
| Hämoglobin (hb)                   | <input type="radio"/> | <input type="radio"/> | <input type="radio"/> | <input type="radio"/> |
| Hämatokrit (hkt)                  | <input type="radio"/> | <input type="radio"/> | <input type="radio"/> | <input type="radio"/> |
| Thrombozyten (thro)               | <input type="radio"/> | <input type="radio"/> | <input type="radio"/> | <input type="radio"/> |
| C-reaktives Protein (crp)         | <input type="radio"/> | <input type="radio"/> | <input type="radio"/> | <input type="radio"/> |
| Kreatinin (krea)                  | <input type="radio"/> | <input type="radio"/> | <input type="radio"/> | <input type="radio"/> |
| Glutamatpyruvattransaminase (gpt) | <input type="radio"/> | <input type="radio"/> | <input type="radio"/> | <input type="radio"/> |
| Gamma-GT (ggt)                    | <input type="radio"/> | <input type="radio"/> | <input type="radio"/> | <input type="radio"/> |
| Laktatdehydrogenase (ldh)         | <input type="radio"/> | <input type="radio"/> | <input type="radio"/> | <input type="radio"/> |
| Ferritin (ferr)                   | <input type="radio"/> | <input type="radio"/> | <input type="radio"/> | <input type="radio"/> |
| Kardiale Troponine (tnt)          | <input type="radio"/> | <input type="radio"/> | <input type="radio"/> | <input type="radio"/> |
| D-Dimer                           | <input type="radio"/> | <input type="radio"/> | <input type="radio"/> | <input type="radio"/> |

Weitere Patienten

57. Haben Sie noch einen weiteren Patienten mit einer SARS-CoV-2 Infektion behandelt?

- Ja  
 Nein

Angaben zu Ihrem 4. Patient

58. Geburtsjahr des Patienten

59. Geschlecht

- weiblich  
 männlich  
 divers

**Beschwerdebild**

60. Welche der folgenden Symptome hat der Patient gezeigt? (Mehrfachantworten möglich)

- |                                                       |                                                   |
|-------------------------------------------------------|---------------------------------------------------|
| <input type="checkbox"/> Plötzlicher Krankheitsbeginn | <input type="checkbox"/> Halsschmerzen / -kratzen |
| <input type="checkbox"/> Akute Luftnot in Ruhe        | <input type="checkbox"/> Schnupfen                |
| <input type="checkbox"/> Akute Luftnot bei Belastung  | <input type="checkbox"/> Kopfschmerzen            |
| <input type="checkbox"/> Schmerzen in der Brust       | <input type="checkbox"/> Durchfall                |
| <input type="checkbox"/> Fieber                       | <input type="checkbox"/> Geschmack verändert      |
| <input type="checkbox"/> Abgeschlagenheit             | <input type="checkbox"/> Geruch verändert         |
| <input type="checkbox"/> Husten                       | <input type="checkbox"/> keine                    |
| <input type="checkbox"/> Gliederschmerzen             |                                                   |
| <input type="checkbox"/> Sonstiges (bitte angeben)    |                                                   |

61. Wann traten die ersten Symptome auf?

- |                                                      |                                                                  |
|------------------------------------------------------|------------------------------------------------------------------|
| <input type="radio"/> bisher keine Symptome          | <input type="radio"/> 4-7 Tage vor der Konsultation              |
| <input type="radio"/> am Tag der Konsultation        | <input type="radio"/> eine Woche und länger vor der Konsultation |
| <input type="radio"/> einen Tag vor der Konsultation | <input type="radio"/> weiß nicht                                 |
| <input type="radio"/> 2-3 Tage vor der Konsultation  |                                                                  |

62. Hatte der Patient eine Röntgendiagnostik des Thorax?

- Ja  
 Nein

63. Falls ja, wurden Infiltrate diagnostiziert?

- Ja  
 Nein

64. Risikofaktoren (Mehrfachantworten möglich)

- |                                                                                      |                                        |
|--------------------------------------------------------------------------------------|----------------------------------------|
| <input type="checkbox"/> Raucher                                                     | <input type="checkbox"/> Malignom      |
| <input type="checkbox"/> aufgrund einer Erkrankung/Therapie geschwächtes Immunsystem | <input type="checkbox"/> Bluthochdruck |
| <input type="checkbox"/> Asthma                                                      | <input type="checkbox"/> Diabetes      |
| <input type="checkbox"/> COPD                                                        |                                        |
| <input type="checkbox"/> sonstige chronische Erkrankung, und zwar                    |                                        |

**Therapie & Verlauf**

Bitte kreuzen Sie alle im Verlauf der Erkrankung zutreffenden Ereignisse (bis zum heutigen Tag) an.

65. Therapie, bis zum heutigen Tag (Mehrfachantworten möglich)

- symptomatisch  
 Antibiotika: Amoxicillin/Clavulansäure  
 Antibiotika: Azithromycin  
 Antibiotika: sonstige  
 stationäre Einweisung  
 Sonstiges (bitte angeben)

66. Verlauf, bis zum heutigen Tag (Mehrfachantworten möglich)

- noch unter Monitoring  
 stationär auf Normalstation  
 stationär auf Intensivstation  
 invasive Beatmung  
 verstorben  
 unbekannt  
 gesund aus Quarantäne entlassen  
 Sonstiges (bitte angeben)

**Laboruntersuchungen**

Bitte beziehen Sie sich stets auf die ersten Laborwerte innerhalb der Episode.

67. Wurde die Diagnose mittels eines PCR Tests bestätigt?

- Ja  
 Nein  
 unbekannt

68. In welchen Abständen wurden ggf. die PCR-Tests wiederholt?(in Tagen)

69. Antikörpertest

|                        | positiv               | negativ               | nicht getestet        |
|------------------------|-----------------------|-----------------------|-----------------------|
| Immunglobulin A (IgA)  | <input type="radio"/> | <input type="radio"/> | <input type="radio"/> |
| Immunglobuline G (IgG) | <input type="radio"/> | <input type="radio"/> | <input type="radio"/> |
| Immunglobulin M (IgM)  | <input type="radio"/> | <input type="radio"/> | <input type="radio"/> |

70. weitere Laborwerte

|                                   | erniedrigt            | Normbereich           | erhöht                | nicht getestet        |
|-----------------------------------|-----------------------|-----------------------|-----------------------|-----------------------|
| Leukozyten (leuk)                 | <input type="radio"/> | <input type="radio"/> | <input type="radio"/> | <input type="radio"/> |
| Eosinophile Granulozyten (eos)    | <input type="radio"/> | <input type="radio"/> | <input type="radio"/> | <input type="radio"/> |
| Hämoglobin (hb)                   | <input type="radio"/> | <input type="radio"/> | <input type="radio"/> | <input type="radio"/> |
| Hämatokrit (hkt)                  | <input type="radio"/> | <input type="radio"/> | <input type="radio"/> | <input type="radio"/> |
| Thrombozyten (thro)               | <input type="radio"/> | <input type="radio"/> | <input type="radio"/> | <input type="radio"/> |
| C-reaktives Protein (crp)         | <input type="radio"/> | <input type="radio"/> | <input type="radio"/> | <input type="radio"/> |
| Kreatinin (krea)                  | <input type="radio"/> | <input type="radio"/> | <input type="radio"/> | <input type="radio"/> |
| Glutamatpyruvattransaminase (gpt) | <input type="radio"/> | <input type="radio"/> | <input type="radio"/> | <input type="radio"/> |
| Gamma-GT (ggt)                    | <input type="radio"/> | <input type="radio"/> | <input type="radio"/> | <input type="radio"/> |
| Laktatdehydrogenase (ldh)         | <input type="radio"/> | <input type="radio"/> | <input type="radio"/> | <input type="radio"/> |
| Ferritin (ferr)                   | <input type="radio"/> | <input type="radio"/> | <input type="radio"/> | <input type="radio"/> |
| Kardiale Troponine (tnt)          | <input type="radio"/> | <input type="radio"/> | <input type="radio"/> | <input type="radio"/> |
| D-Dimer                           | <input type="radio"/> | <input type="radio"/> | <input type="radio"/> | <input type="radio"/> |

Weitere Patienten

71. Haben Sie noch einen weiteren Patienten mit einer SARS-CoV-2 Infektion behandelt?

- Ja  
 Nein

Angaben zu Ihrem 5. Patienten

72. Geburtsjahr des Patienten

73. Geschlecht

- weiblich  
 männlich  
 divers

**Beschwerdebild**

74. Welche der folgenden Symptome hat der Patient gezeigt? (Mehrfachantworten möglich)

- |                                                       |                                                   |
|-------------------------------------------------------|---------------------------------------------------|
| <input type="checkbox"/> Plötzlicher Krankheitsbeginn | <input type="checkbox"/> Halsschmerzen / -kratzen |
| <input type="checkbox"/> Akute Luftnot in Ruhe        | <input type="checkbox"/> Schnupfen                |
| <input type="checkbox"/> Akute Luftnot bei Belastung  | <input type="checkbox"/> Kopfschmerzen            |
| <input type="checkbox"/> Schmerzen in der Brust       | <input type="checkbox"/> Durchfall                |
| <input type="checkbox"/> Fieber                       | <input type="checkbox"/> Geschmack verändert      |
| <input type="checkbox"/> Abgeschlagenheit             | <input type="checkbox"/> Geruch verändert         |
| <input type="checkbox"/> Husten                       | <input type="checkbox"/> keine                    |
| <input type="checkbox"/> Gliederschmerzen             |                                                   |
| <input type="checkbox"/> Sonstiges (bitte angeben)    |                                                   |

75. Wann traten die ersten Symptome auf?

- |                                                      |                                                                  |
|------------------------------------------------------|------------------------------------------------------------------|
| <input type="radio"/> bisher keine Symptome          | <input type="radio"/> 4-7 Tage vor der Konsultation              |
| <input type="radio"/> am Tag der Konsultation        | <input type="radio"/> eine Woche und länger vor der Konsultation |
| <input type="radio"/> einen Tag vor der Konsultation | <input type="radio"/> weiß nicht                                 |
| <input type="radio"/> 2-3 Tage vor der Konsultation  |                                                                  |

76. Hatte der Patient eine Röntgendiagnostik des Thorax?

- Ja  
 Nein



77. Falls ja, wurden Infiltrate diagnostiziert?

- Ja  
 Nein

78. Risikofaktoren (Mehrfachantworten möglich)

- |                                                                                      |                                        |
|--------------------------------------------------------------------------------------|----------------------------------------|
| <input type="checkbox"/> Raucher                                                     | <input type="checkbox"/> Malignom      |
| <input type="checkbox"/> aufgrund einer Erkrankung/Therapie geschwächtes Immunsystem | <input type="checkbox"/> Bluthochdruck |
| <input type="checkbox"/> Asthma                                                      | <input type="checkbox"/> Diabetes      |
| <input type="checkbox"/> COPD                                                        |                                        |
| <input type="checkbox"/> sonstige chronische Erkrankung, und zwar                    |                                        |

**Therapie & Verlauf**

Bitte kreuzen Sie alle im Verlauf der Erkrankung zutreffenden Ereignisse (bis zum heutigen Tag) an.

79. Therapie, bis zum heutigen Tag (Mehrfachantworten möglich)

- symptomatisch  
 Antibiotika: Amoxicillin/Clavulansäure  
 Antibiotika: Azithromycin  
 Antibiotika: sonstige  
 stationäre Einweisung  
 Sonstiges (bitte angeben)

80. Verlauf, bis zum heutigen Tag (Mehrfachantworten möglich)

- noch unter Monitoring  
 stationär auf Normalstation  
 stationär auf Intensivstation  
 invasive Beatmung  
 verstorben  
 unbekannt  
 gesund aus Quarantäne entlassen  
 Sonstiges (bitte angeben)

**Laboruntersuchungen**

Bitte beziehen Sie sich stets auf die ersten Laborwerte innerhalb der Episode.

81. Wurde die Diagnose mittels eines PCR Tests bestätigt?

- Ja  
 Nein  
 unbekannt

82. In welchen Abständen wurden ggf. die PCR-Tests wiederholt?(in Tagen)

83. Antikörpertest

|                        | positiv               | negativ               | nicht getestet        |
|------------------------|-----------------------|-----------------------|-----------------------|
| Immunglobulin A (IgA)  | <input type="radio"/> | <input type="radio"/> | <input type="radio"/> |
| Immunglobuline G (IgG) | <input type="radio"/> | <input type="radio"/> | <input type="radio"/> |
| Immunglobulin M (IgM)  | <input type="radio"/> | <input type="radio"/> | <input type="radio"/> |

84. weitere Laborwerte

|                                   | erniedrigt            | Normbereich           | erhöht                | nicht getestet        |
|-----------------------------------|-----------------------|-----------------------|-----------------------|-----------------------|
| Leukozyten (leuk)                 | <input type="radio"/> | <input type="radio"/> | <input type="radio"/> | <input type="radio"/> |
| Eosinophile Granulozyten (eos)    | <input type="radio"/> | <input type="radio"/> | <input type="radio"/> | <input type="radio"/> |
| Hämoglobin (hb)                   | <input type="radio"/> | <input type="radio"/> | <input type="radio"/> | <input type="radio"/> |
| Hämatokrit (hkt)                  | <input type="radio"/> | <input type="radio"/> | <input type="radio"/> | <input type="radio"/> |
| Thrombozyten (thro)               | <input type="radio"/> | <input type="radio"/> | <input type="radio"/> | <input type="radio"/> |
| C-reaktives Protein (crp)         | <input type="radio"/> | <input type="radio"/> | <input type="radio"/> | <input type="radio"/> |
| Kreatinin (krea)                  | <input type="radio"/> | <input type="radio"/> | <input type="radio"/> | <input type="radio"/> |
| Glutamatpyruvattransaminase (gpt) | <input type="radio"/> | <input type="radio"/> | <input type="radio"/> | <input type="radio"/> |
| Gamma-GT (ggt)                    | <input type="radio"/> | <input type="radio"/> | <input type="radio"/> | <input type="radio"/> |
| Laktatdehydrogenase (ldh)         | <input type="radio"/> | <input type="radio"/> | <input type="radio"/> | <input type="radio"/> |
| Ferritin (ferr)                   | <input type="radio"/> | <input type="radio"/> | <input type="radio"/> | <input type="radio"/> |
| Kardiale Troponine (tnt)          | <input type="radio"/> | <input type="radio"/> | <input type="radio"/> | <input type="radio"/> |
| D-Dimer                           | <input type="radio"/> | <input type="radio"/> | <input type="radio"/> | <input type="radio"/> |

Weitere Patienten

85. Haben Sie noch einen weiteren Patienten mit einer SARS-CoV-2 Infektion behandelt?

- Ja  
 Nein

Angaben zu Ihrem 6. Patienten

86. Geburtsjahr des Patienten

87. Geschlecht

- weiblich  
 männlich  
 divers

**Beschwerdebild**

88. Welche der folgenden Symptome hat der Patient gezeigt? (Mehrfachantworten möglich)

- |                                                       |                                                   |
|-------------------------------------------------------|---------------------------------------------------|
| <input type="checkbox"/> Plötzlicher Krankheitsbeginn | <input type="checkbox"/> Halsschmerzen / -kratzen |
| <input type="checkbox"/> Akute Luftnot in Ruhe        | <input type="checkbox"/> Schnupfen                |
| <input type="checkbox"/> Akute Luftnot bei Belastung  | <input type="checkbox"/> Kopfschmerzen            |
| <input type="checkbox"/> Schmerzen in der Brust       | <input type="checkbox"/> Durchfall                |
| <input type="checkbox"/> Fieber                       | <input type="checkbox"/> Geschmack verändert      |
| <input type="checkbox"/> Abgeschlagenheit             | <input type="checkbox"/> Geruch verändert         |
| <input type="checkbox"/> Husten                       | <input type="checkbox"/> keine                    |
| <input type="checkbox"/> Gliederschmerzen             |                                                   |
| <input type="checkbox"/> Sonstiges (bitte angeben)    |                                                   |

89. Wann traten die ersten Symptome auf?

- |                                                      |                                                                  |
|------------------------------------------------------|------------------------------------------------------------------|
| <input type="radio"/> bisher keine Symptome          | <input type="radio"/> 4-7 Tage vor der Konsultation              |
| <input type="radio"/> am Tag der Konsultation        | <input type="radio"/> eine Woche und länger vor der Konsultation |
| <input type="radio"/> einen Tag vor der Konsultation | <input type="radio"/> weiß nicht                                 |
| <input type="radio"/> 2-3 Tage vor der Konsultation  |                                                                  |

90. Hatte der Patient eine Röntgendiagnostik des Thorax?

- Ja  
 Nein

91. Falls ja, wurden Infiltrate diagnostiziert?

- Ja  
 Nein

92. Risikofaktoren (Mehrfachantworten möglich)

- |                                                                                      |                                        |
|--------------------------------------------------------------------------------------|----------------------------------------|
| <input type="checkbox"/> Raucher                                                     | <input type="checkbox"/> Malignom      |
| <input type="checkbox"/> aufgrund einer Erkrankung/Therapie geschwächtes Immunsystem | <input type="checkbox"/> Bluthochdruck |
| <input type="checkbox"/> Asthma                                                      | <input type="checkbox"/> Diabetes      |
| <input type="checkbox"/> COPD                                                        |                                        |
| <input type="checkbox"/> sonstige chronische Erkrankung, und zwar                    |                                        |

**Therapie & Verlauf**

Bitte kreuzen Sie alle im Verlauf der Erkrankung zutreffenden Ereignisse (bis zum heutigen Tag) an.

93. Therapie, bis zum heutigen Tag (Mehrfachantworten möglich)

- symptomatisch  
 Antibiotika: Amoxicillin/Clavulansäure  
 Antibiotika: Azithromycin  
 Antibiotika: sonstige  
 stationäre Einweisung  
 Sonstiges (bitte angeben)

94. Verlauf, bis zum heutigen Tag (Mehrfachantworten möglich)

- noch unter Monitoring  
 stationär auf Normalstation  
 stationär auf Intensivstation  
 invasive Beatmung  
 verstorben  
 unbekannt  
 gesund aus Quarantäne entlassen  
 Sonstiges (bitte angeben)

**Laboruntersuchungen**

Bitte beziehen Sie sich stets auf die ersten Laborwerte innerhalb der Episode.

95. Wurde die Diagnose mittels eines PCR Tests bestätigt?

- Ja  
 Nein  
 unbekannt

96. In welchen Abständen wurden ggf. die PCR-Tests wiederholt?(in Tagen)

97. Antikörpertest

|                        | positiv               | negativ               | nicht getestet        |
|------------------------|-----------------------|-----------------------|-----------------------|
| Immunglobulin A (IgA)  | <input type="radio"/> | <input type="radio"/> | <input type="radio"/> |
| Immunglobuline G (IgG) | <input type="radio"/> | <input type="radio"/> | <input type="radio"/> |
| Immunglobulin M (IgM)  | <input type="radio"/> | <input type="radio"/> | <input type="radio"/> |

98. weitere Laborwerte

|                                   | erniedrigt            | Normbereich           | erhöht                | nicht getestet        |
|-----------------------------------|-----------------------|-----------------------|-----------------------|-----------------------|
| Leukozyten (leuk)                 | <input type="radio"/> | <input type="radio"/> | <input type="radio"/> | <input type="radio"/> |
| Eosinophile Granulozyten (eos)    | <input type="radio"/> | <input type="radio"/> | <input type="radio"/> | <input type="radio"/> |
| Hämoglobin (hb)                   | <input type="radio"/> | <input type="radio"/> | <input type="radio"/> | <input type="radio"/> |
| Hämatokrit (hkt)                  | <input type="radio"/> | <input type="radio"/> | <input type="radio"/> | <input type="radio"/> |
| Thrombozyten (thro)               | <input type="radio"/> | <input type="radio"/> | <input type="radio"/> | <input type="radio"/> |
| C-reaktives Protein (crp)         | <input type="radio"/> | <input type="radio"/> | <input type="radio"/> | <input type="radio"/> |
| Kreatinin (krea)                  | <input type="radio"/> | <input type="radio"/> | <input type="radio"/> | <input type="radio"/> |
| Glutamatpyruvattransaminase (gpt) | <input type="radio"/> | <input type="radio"/> | <input type="radio"/> | <input type="radio"/> |
| Gamma-GT (ggt)                    | <input type="radio"/> | <input type="radio"/> | <input type="radio"/> | <input type="radio"/> |
| Laktatdehydrogenase (ldh)         | <input type="radio"/> | <input type="radio"/> | <input type="radio"/> | <input type="radio"/> |
| Ferritin (ferr)                   | <input type="radio"/> | <input type="radio"/> | <input type="radio"/> | <input type="radio"/> |
| Kardiale Troponine (tnt)          | <input type="radio"/> | <input type="radio"/> | <input type="radio"/> | <input type="radio"/> |
| D-Dimer                           | <input type="radio"/> | <input type="radio"/> | <input type="radio"/> | <input type="radio"/> |

Weitere Patienten

99. Haben Sie noch einen weiteren Patienten mit einer SARS-CoV-2 Infektion behandelt?

- Ja  
 Nein

Angaben zu Ihrem 7. Patienten

100. Geburtsjahr des Patienten

101. Geschlecht

- weiblich  
 männlich  
 divers

**Beschwerdebild**

102. Welche der folgenden Symptome hat der Patient gezeigt? (Mehrfachantworten möglich)

- |                                                       |                                                   |
|-------------------------------------------------------|---------------------------------------------------|
| <input type="checkbox"/> Plötzlicher Krankheitsbeginn | <input type="checkbox"/> Halsschmerzen / -kratzen |
| <input type="checkbox"/> Akute Luftnot in Ruhe        | <input type="checkbox"/> Schnupfen                |
| <input type="checkbox"/> Akute Luftnot bei Belastung  | <input type="checkbox"/> Kopfschmerzen            |
| <input type="checkbox"/> Schmerzen in der Brust       | <input type="checkbox"/> Durchfall                |
| <input type="checkbox"/> Fieber                       | <input type="checkbox"/> Geschmack verändert      |
| <input type="checkbox"/> Abgeschlagenheit             | <input type="checkbox"/> Geruch verändert         |
| <input type="checkbox"/> Husten                       | <input type="checkbox"/> keine                    |
| <input type="checkbox"/> Gliederschmerzen             |                                                   |
| <input type="checkbox"/> Sonstiges (bitte angeben)    |                                                   |

103. Wann traten die ersten Symptome auf?

- |                                                      |                                                                  |
|------------------------------------------------------|------------------------------------------------------------------|
| <input type="radio"/> bisher keine Symptome          | <input type="radio"/> 4-7 Tage vor der Konsultation              |
| <input type="radio"/> am Tag der Konsultation        | <input type="radio"/> eine Woche und länger vor der Konsultation |
| <input type="radio"/> einen Tag vor der Konsultation | <input type="radio"/> weiß nicht                                 |
| <input type="radio"/> 2-3 Tage vor der Konsultation  |                                                                  |

104. Hatte der Patient eine Röntgendiagnostik des Thorax?

- Ja  
 Nein

105. Falls ja, wurden Infiltrate diagnostiziert?

- Ja  
 Nein

106. Risikofaktoren (Mehrfachantworten möglich)

- |                                                                                      |                                        |
|--------------------------------------------------------------------------------------|----------------------------------------|
| <input type="checkbox"/> Raucher                                                     | <input type="checkbox"/> Malignom      |
| <input type="checkbox"/> aufgrund einer Erkrankung/Therapie geschwächtes Immunsystem | <input type="checkbox"/> Bluthochdruck |
| <input type="checkbox"/> Asthma                                                      | <input type="checkbox"/> Diabetes      |
| <input type="checkbox"/> COPD                                                        |                                        |
| <input type="checkbox"/> sonstige chronische Erkrankung, und zwar                    |                                        |

**Therapie & Verlauf**

Bitte kreuzen Sie alle im Verlauf der Erkrankung zutreffenden Ereignisse (bis zum heutigen Tag) an.

107. Therapie, bis zum heutigen Tag (Mehrfachantworten möglich)

- symptomatisch  
 Antibiotika: Amoxicillin/Clavulansäure  
 Antibiotika: Azithromycin  
 Antibiotika: sonstige  
 stationäre Einweisung  
 Sonstiges (bitte angeben)

108. Verlauf, bis zum heutigen Tag (Mehrfachantworten möglich)

- noch unter Monitoring  
 stationär auf Normalstation  
 stationär auf Intensivstation  
 invasive Beatmung  
 verstorben  
 unbekannt  
 gesund aus Quarantäne entlassen  
 Sonstiges (bitte angeben)

**Laboruntersuchungen**

Bitte beziehen Sie sich stets auf die ersten Laborwerte innerhalb der Episode.

109. Wurde die Diagnose mittels eines PCR Tests bestätigt?

- Ja
- Nein
- unbekannt

110. In welchen Abständen wurden ggf. die PCR-Tests wiederholt?(in Tagen)

111. Antikörpertest

|                        | positiv               | negativ               | nicht getestet        |
|------------------------|-----------------------|-----------------------|-----------------------|
| Immunglobulin A (IgA)  | <input type="radio"/> | <input type="radio"/> | <input type="radio"/> |
| Immunglobuline G (IgG) | <input type="radio"/> | <input type="radio"/> | <input type="radio"/> |
| Immunglobulin M (IgM)  | <input type="radio"/> | <input type="radio"/> | <input type="radio"/> |

112. weitere Laborwerte

|                                   | erniedrigt            | Normbereich           | erhöht                | nicht getestet        |
|-----------------------------------|-----------------------|-----------------------|-----------------------|-----------------------|
| Leukozyten (leuk)                 | <input type="radio"/> | <input type="radio"/> | <input type="radio"/> | <input type="radio"/> |
| Eosinophile Granulozyten (eos)    | <input type="radio"/> | <input type="radio"/> | <input type="radio"/> | <input type="radio"/> |
| Hämoglobin (hb)                   | <input type="radio"/> | <input type="radio"/> | <input type="radio"/> | <input type="radio"/> |
| Hämatokrit (hkt)                  | <input type="radio"/> | <input type="radio"/> | <input type="radio"/> | <input type="radio"/> |
| Thrombozyten (thro)               | <input type="radio"/> | <input type="radio"/> | <input type="radio"/> | <input type="radio"/> |
| C-reaktives Protein (crp)         | <input type="radio"/> | <input type="radio"/> | <input type="radio"/> | <input type="radio"/> |
| Kreatinin (krea)                  | <input type="radio"/> | <input type="radio"/> | <input type="radio"/> | <input type="radio"/> |
| Glutamatpyruvattransaminase (gpt) | <input type="radio"/> | <input type="radio"/> | <input type="radio"/> | <input type="radio"/> |
| Gamma-GT (ggt)                    | <input type="radio"/> | <input type="radio"/> | <input type="radio"/> | <input type="radio"/> |
| Laktatdehydrogenase (ldh)         | <input type="radio"/> | <input type="radio"/> | <input type="radio"/> | <input type="radio"/> |
| Ferritin (ferr)                   | <input type="radio"/> | <input type="radio"/> | <input type="radio"/> | <input type="radio"/> |
| Kardiale Troponine (tnt)          | <input type="radio"/> | <input type="radio"/> | <input type="radio"/> | <input type="radio"/> |
| D-Dimer                           | <input type="radio"/> | <input type="radio"/> | <input type="radio"/> | <input type="radio"/> |

Weitere Patienten

113. Haben Sie noch einen weiteren Patienten mit einer SARS-CoV-2 Infektion behandelt?

- Ja
- Nein



Angaben zu Ihrem 8. Patienten

114. Geburtsjahr des Patienten

115. Geschlecht

- weiblich  
 männlich  
 divers

**Beschwerdebild**

116. Welche der folgenden Symptome hat der Patient gezeigt? (Mehrfachantworten möglich)

- |                                                       |                                                   |
|-------------------------------------------------------|---------------------------------------------------|
| <input type="checkbox"/> Plötzlicher Krankheitsbeginn | <input type="checkbox"/> Halsschmerzen / -kratzen |
| <input type="checkbox"/> Akute Luftnot in Ruhe        | <input type="checkbox"/> Schnupfen                |
| <input type="checkbox"/> Akute Luftnot bei Belastung  | <input type="checkbox"/> Kopfschmerzen            |
| <input type="checkbox"/> Schmerzen in der Brust       | <input type="checkbox"/> Durchfall                |
| <input type="checkbox"/> Fieber                       | <input type="checkbox"/> Geschmack verändert      |
| <input type="checkbox"/> Abgeschlagenheit             | <input type="checkbox"/> Geruch verändert         |
| <input type="checkbox"/> Husten                       | <input type="checkbox"/> keine                    |
| <input type="checkbox"/> Gliederschmerzen             |                                                   |
| <input type="checkbox"/> Sonstiges (bitte angeben)    |                                                   |

117. Wann traten die ersten Symptome auf?

- |                                                      |                                                                  |
|------------------------------------------------------|------------------------------------------------------------------|
| <input type="radio"/> bisher keine Symptome          | <input type="radio"/> 4-7 Tage vor der Konsultation              |
| <input type="radio"/> am Tag der Konsultation        | <input type="radio"/> eine Woche und länger vor der Konsultation |
| <input type="radio"/> einen Tag vor der Konsultation | <input type="radio"/> weiß nicht                                 |
| <input type="radio"/> 2-3 Tage vor der Konsultation  |                                                                  |

118. Hatte der Patient eine Röntgendiagnostik des Thorax?

- Ja  
 Nein

119. Falls ja, wurden Infiltrate diagnostiziert?

- Ja  
 Nein

120. Risikofaktoren (Mehrfachantworten möglich)

- |                                                                                      |                                        |
|--------------------------------------------------------------------------------------|----------------------------------------|
| <input type="checkbox"/> Raucher                                                     | <input type="checkbox"/> Malignom      |
| <input type="checkbox"/> aufgrund einer Erkrankung/Therapie geschwächtes Immunsystem | <input type="checkbox"/> Bluthochdruck |
| <input type="checkbox"/> Asthma                                                      | <input type="checkbox"/> Diabetes      |
| <input type="checkbox"/> COPD                                                        |                                        |
| <input type="checkbox"/> sonstige chronische Erkrankung, und zwar                    |                                        |

**Therapie & Verlauf**

Bitte kreuzen Sie alle im Verlauf der Erkrankung zutreffenden Ereignisse (bis zum heutigen Tag) an.

121. Therapie, bis zum heutigen Tag (Mehrfachantworten möglich)

- symptomatisch  
 Antibiotika: Amoxicillin/Clavulansäure  
 Antibiotika: Azithromycin  
 Antibiotika: sonstige  
 stationäre Einweisung  
 Sonstiges (bitte angeben)

122. Verlauf, bis zum heutigen Tag (Mehrfachantworten möglich)

- noch unter Monitoring  
 stationär auf Normalstation  
 stationär auf Intensivstation  
 invasive Beatmung  
 verstorben  
 unbekannt  
 gesund aus Quarantäne entlassen  
 Sonstiges (bitte angeben)

**Laboruntersuchungen**

Bitte beziehen Sie sich stets auf die ersten Laborwerte innerhalb der Episode.

123. Wurde die Diagnose mittels eines PCR Tests bestätigt?

- Ja  
 Nein  
 unbekannt

124. In welchen Abständen wurden ggf. die PCR-Tests wiederholt?(in Tagen)

125. Antikörpertest

|                        | positiv               | negativ               | nicht getestet        |
|------------------------|-----------------------|-----------------------|-----------------------|
| Immunglobulin A (IgA)  | <input type="radio"/> | <input type="radio"/> | <input type="radio"/> |
| Immunglobuline G (IgG) | <input type="radio"/> | <input type="radio"/> | <input type="radio"/> |
| Immunglobulin M (IgM)  | <input type="radio"/> | <input type="radio"/> | <input type="radio"/> |

126. weitere Laborwerte

|                                   | erniedrigt            | Normbereich           | erhöht                | nicht getestet        |
|-----------------------------------|-----------------------|-----------------------|-----------------------|-----------------------|
| Leukozyten (leuk)                 | <input type="radio"/> | <input type="radio"/> | <input type="radio"/> | <input type="radio"/> |
| Eosinophile Granulozyten (eos)    | <input type="radio"/> | <input type="radio"/> | <input type="radio"/> | <input type="radio"/> |
| Hämoglobin (hb)                   | <input type="radio"/> | <input type="radio"/> | <input type="radio"/> | <input type="radio"/> |
| Hämatokrit (hkt)                  | <input type="radio"/> | <input type="radio"/> | <input type="radio"/> | <input type="radio"/> |
| Thrombozyten (thro)               | <input type="radio"/> | <input type="radio"/> | <input type="radio"/> | <input type="radio"/> |
| C-reaktives Protein (crp)         | <input type="radio"/> | <input type="radio"/> | <input type="radio"/> | <input type="radio"/> |
| Kreatinin (krea)                  | <input type="radio"/> | <input type="radio"/> | <input type="radio"/> | <input type="radio"/> |
| Glutamatpyruvattransaminase (gpt) | <input type="radio"/> | <input type="radio"/> | <input type="radio"/> | <input type="radio"/> |
| Gamma-GT (ggt)                    | <input type="radio"/> | <input type="radio"/> | <input type="radio"/> | <input type="radio"/> |
| Laktatdehydrogenase (ldh)         | <input type="radio"/> | <input type="radio"/> | <input type="radio"/> | <input type="radio"/> |
| Ferritin (ferr)                   | <input type="radio"/> | <input type="radio"/> | <input type="radio"/> | <input type="radio"/> |
| Kardiale Troponine (tnt)          | <input type="radio"/> | <input type="radio"/> | <input type="radio"/> | <input type="radio"/> |
| D-Dimer                           | <input type="radio"/> | <input type="radio"/> | <input type="radio"/> | <input type="radio"/> |

Weitere Patienten

127. Haben Sie noch einen weiteren Patienten mit einer SARS-CoV-2 Infektion behandelt?

- Ja  
 Nein

Angaben zu Ihrem 9. Patienten

128. Geburtsjahr des Patienten

129. Geschlecht

- weiblich  
 männlich  
 divers

**Beschwerdebild**

130. Welche der folgenden Symptome hat der Patient gezeigt? (Mehrfachantworten möglich)

- |                                                       |                                                   |
|-------------------------------------------------------|---------------------------------------------------|
| <input type="checkbox"/> Plötzlicher Krankheitsbeginn | <input type="checkbox"/> Halsschmerzen / -kratzen |
| <input type="checkbox"/> Akute Luftnot in Ruhe        | <input type="checkbox"/> Schnupfen                |
| <input type="checkbox"/> Akute Luftnot bei Belastung  | <input type="checkbox"/> Kopfschmerzen            |
| <input type="checkbox"/> Schmerzen in der Brust       | <input type="checkbox"/> Durchfall                |
| <input type="checkbox"/> Fieber                       | <input type="checkbox"/> Geschmack verändert      |
| <input type="checkbox"/> Abgeschlagenheit             | <input type="checkbox"/> Geruch verändert         |
| <input type="checkbox"/> Husten                       | <input type="checkbox"/> keine                    |
| <input type="checkbox"/> Gliederschmerzen             |                                                   |
| <input type="checkbox"/> Sonstiges (bitte angeben)    |                                                   |

131. Wann traten die ersten Symptome auf?

- |                                                      |                                                                  |
|------------------------------------------------------|------------------------------------------------------------------|
| <input type="radio"/> bisher keine Symptome          | <input type="radio"/> 4-7 Tage vor der Konsultation              |
| <input type="radio"/> am Tag der Konsultation        | <input type="radio"/> eine Woche und länger vor der Konsultation |
| <input type="radio"/> einen Tag vor der Konsultation | <input type="radio"/> weiß nicht                                 |
| <input type="radio"/> 2-3 Tage vor der Konsultation  |                                                                  |

132. Hatte der Patient eine Röntgendiagnostik des Thorax?

- Ja  
 Nein

133. Falls ja, wurden Infiltrate diagnostiziert?

- Ja  
 Nein

134. Risikofaktoren (Mehrfachantworten möglich)

- |                                                                                      |                                        |
|--------------------------------------------------------------------------------------|----------------------------------------|
| <input type="checkbox"/> Raucher                                                     | <input type="checkbox"/> Malignom      |
| <input type="checkbox"/> aufgrund einer Erkrankung/Therapie geschwächtes Immunsystem | <input type="checkbox"/> Bluthochdruck |
| <input type="checkbox"/> Asthma                                                      | <input type="checkbox"/> Diabetes      |
| <input type="checkbox"/> COPD                                                        |                                        |
| <input type="checkbox"/> sonstige chronische Erkrankung, und zwar                    |                                        |

**Therapie & Verlauf**

Bitte kreuzen Sie alle im Verlauf der Erkrankung zutreffenden Ereignisse (bis zum heutigen Tag) an.

135. Therapie, bis zum heutigen Tag (Mehrfachantworten möglich)

- symptomatisch  
 Antibiotika: Amoxicillin/Clavulansäure  
 Antibiotika: Azithromycin  
 Antibiotika: sonstige  
 stationäre Einweisung  
 Sonstiges (bitte angeben)

136. Verlauf, bis zum heutigen Tag (Mehrfachantworten möglich)

- noch unter Monitoring  
 stationär auf Normalstation  
 stationär auf Intensivstation  
 invasive Beatmung  
 verstorben  
 unbekannt  
 gesund aus Quarantäne entlassen  
 Sonstiges (bitte angeben)

**Laboruntersuchungen**

Bitte beziehen Sie sich stets auf die ersten Laborwerte innerhalb der Episode.

137. Wurde die Diagnose mittels eines PCR Tests bestätigt?

- Ja  
 Nein  
 unbekannt

138. In welchen Abständen wurden ggf. die PCR-Tests wiederholt?(in Tagen)

139. Antikörpertest

|                        | positiv               | negativ               | nicht getestet        |
|------------------------|-----------------------|-----------------------|-----------------------|
| Immunglobulin A (IgA)  | <input type="radio"/> | <input type="radio"/> | <input type="radio"/> |
| Immunglobuline G (IgG) | <input type="radio"/> | <input type="radio"/> | <input type="radio"/> |
| Immunglobulin M (IgM)  | <input type="radio"/> | <input type="radio"/> | <input type="radio"/> |

140. weitere Laborwerte

|                                   | erniedrigt            | Normbereich           | erhöht                | nicht getestet        |
|-----------------------------------|-----------------------|-----------------------|-----------------------|-----------------------|
| Leukozyten (leuk)                 | <input type="radio"/> | <input type="radio"/> | <input type="radio"/> | <input type="radio"/> |
| Eosinophile Granulozyten (eos)    | <input type="radio"/> | <input type="radio"/> | <input type="radio"/> | <input type="radio"/> |
| Hämoglobin (hb)                   | <input type="radio"/> | <input type="radio"/> | <input type="radio"/> | <input type="radio"/> |
| Hämatokrit (hkt)                  | <input type="radio"/> | <input type="radio"/> | <input type="radio"/> | <input type="radio"/> |
| Thrombozyten (thro)               | <input type="radio"/> | <input type="radio"/> | <input type="radio"/> | <input type="radio"/> |
| C-reaktives Protein (crp)         | <input type="radio"/> | <input type="radio"/> | <input type="radio"/> | <input type="radio"/> |
| Kreatinin (krea)                  | <input type="radio"/> | <input type="radio"/> | <input type="radio"/> | <input type="radio"/> |
| Glutamatpyruvattransaminase (gpt) | <input type="radio"/> | <input type="radio"/> | <input type="radio"/> | <input type="radio"/> |
| Gamma-GT (ggt)                    | <input type="radio"/> | <input type="radio"/> | <input type="radio"/> | <input type="radio"/> |
| Laktatdehydrogenase (ldh)         | <input type="radio"/> | <input type="radio"/> | <input type="radio"/> | <input type="radio"/> |
| Ferritin (ferr)                   | <input type="radio"/> | <input type="radio"/> | <input type="radio"/> | <input type="radio"/> |
| Kardiale Troponine (tnt)          | <input type="radio"/> | <input type="radio"/> | <input type="radio"/> | <input type="radio"/> |
| D-Dimer                           | <input type="radio"/> | <input type="radio"/> | <input type="radio"/> | <input type="radio"/> |

Weitere Patienten

141. Haben Sie noch einen weiteren Patienten mit einer SARS-CoV-2 Infektion behandelt?

- Ja  
 Nein

Angaben zu Ihrem 10. Patienten

142. Geburtsjahr des Patienten

143. Geschlecht

- weiblich  
 männlich  
 divers

**Beschwerdebild**

144. Welche der folgenden Symptome hat der Patient gezeigt? (Mehrfachantworten möglich)

- |                                                       |                                                   |
|-------------------------------------------------------|---------------------------------------------------|
| <input type="checkbox"/> Plötzlicher Krankheitsbeginn | <input type="checkbox"/> Halsschmerzen / -kratzen |
| <input type="checkbox"/> Akute Luftnot in Ruhe        | <input type="checkbox"/> Schnupfen                |
| <input type="checkbox"/> Akute Luftnot bei Belastung  | <input type="checkbox"/> Kopfschmerzen            |
| <input type="checkbox"/> Schmerzen in der Brust       | <input type="checkbox"/> Durchfall                |
| <input type="checkbox"/> Fieber                       | <input type="checkbox"/> Geschmack verändert      |
| <input type="checkbox"/> Abgeschlagenheit             | <input type="checkbox"/> Geruch verändert         |
| <input type="checkbox"/> Husten                       | <input type="checkbox"/> keine                    |
| <input type="checkbox"/> Gliederschmerzen             |                                                   |
| <input type="checkbox"/> Sonstiges (bitte angeben)    |                                                   |

145. Wann traten die ersten Symptome auf?

- |                                                      |                                                                  |
|------------------------------------------------------|------------------------------------------------------------------|
| <input type="radio"/> bisher keine Symptome          | <input type="radio"/> 4-7 Tage vor der Konsultation              |
| <input type="radio"/> am Tag der Konsultation        | <input type="radio"/> eine Woche und länger vor der Konsultation |
| <input type="radio"/> einen Tag vor der Konsultation | <input type="radio"/> weiß nicht                                 |
| <input type="radio"/> 2-3 Tage vor der Konsultation  |                                                                  |

146. Hatte der Patient eine Röntgendiagnostik des Thorax?

- Ja  
 Nein

147. Falls ja, wurden Infiltrate diagnostiziert?

- Ja  
 Nein

148. Risikofaktoren (Mehrfachantworten möglich)

- |                                                                                      |                                        |
|--------------------------------------------------------------------------------------|----------------------------------------|
| <input type="checkbox"/> Raucher                                                     | <input type="checkbox"/> Malignom      |
| <input type="checkbox"/> aufgrund einer Erkrankung/Therapie geschwächtes Immunsystem | <input type="checkbox"/> Bluthochdruck |
| <input type="checkbox"/> Asthma                                                      | <input type="checkbox"/> Diabetes      |
| <input type="checkbox"/> COPD                                                        |                                        |
| <input type="checkbox"/> sonstige chronische Erkrankung, und zwar                    |                                        |

**Therapie & Verlauf**

Bitte kreuzen Sie alle im Verlauf der Erkrankung zutreffenden Ereignisse (bis zum heutigen Tag) an.

149. Therapie, bis zum heutigen Tag (Mehrfachantworten möglich)

- symptomatisch  
 Antibiotika: Amoxicillin/Clavulansäure  
 Antibiotika: Azithromycin  
 Antibiotika: sonstige  
 stationäre Einweisung  
 Sonstiges (bitte angeben)

150. Verlauf, bis zum heutigen Tag (Mehrfachantworten möglich)

- noch unter Monitoring  
 stationär auf Normalstation  
 stationär auf Intensivstation  
 invasive Beatmung  
 verstorben  
 unbekannt  
 gesund aus Quarantäne entlassen  
 Sonstiges (bitte angeben)

**Laboruntersuchungen**

Bitte beziehen Sie sich stets auf die ersten Laborwerte innerhalb der Episode.



151. Wurde die Diagnose mittels eines PCR Tests bestätigt?

- Ja  
 Nein  
 unbekannt

152. In welchen Abständen wurden ggf. die PCR-Tests wiederholt?(in Tagen)

153. Antikörpertest

|                        | positiv               | negativ               | nicht getestet        |
|------------------------|-----------------------|-----------------------|-----------------------|
| Immunglobulin A (IgA)  | <input type="radio"/> | <input type="radio"/> | <input type="radio"/> |
| Immunglobuline G (IgG) | <input type="radio"/> | <input type="radio"/> | <input type="radio"/> |
| Immunglobulin M (IgM)  | <input type="radio"/> | <input type="radio"/> | <input type="radio"/> |

154. weitere Laborwerte

|                                   | erniedrigt            | Normbereich           | erhöht                | nicht getestet        |
|-----------------------------------|-----------------------|-----------------------|-----------------------|-----------------------|
| Leukozyten (leuk)                 | <input type="radio"/> | <input type="radio"/> | <input type="radio"/> | <input type="radio"/> |
| Eosinophile Granulozyten (eos)    | <input type="radio"/> | <input type="radio"/> | <input type="radio"/> | <input type="radio"/> |
| Hämoglobin (hb)                   | <input type="radio"/> | <input type="radio"/> | <input type="radio"/> | <input type="radio"/> |
| Hämatokrit (hkt)                  | <input type="radio"/> | <input type="radio"/> | <input type="radio"/> | <input type="radio"/> |
| Thrombozyten (thro)               | <input type="radio"/> | <input type="radio"/> | <input type="radio"/> | <input type="radio"/> |
| C-reaktives Protein (crp)         | <input type="radio"/> | <input type="radio"/> | <input type="radio"/> | <input type="radio"/> |
| Kreatinin (krea)                  | <input type="radio"/> | <input type="radio"/> | <input type="radio"/> | <input type="radio"/> |
| Glutamatpyruvattransaminase (gpt) | <input type="radio"/> | <input type="radio"/> | <input type="radio"/> | <input type="radio"/> |
| Gamma-GT (ggt)                    | <input type="radio"/> | <input type="radio"/> | <input type="radio"/> | <input type="radio"/> |
| Laktatdehydrogenase (ldh)         | <input type="radio"/> | <input type="radio"/> | <input type="radio"/> | <input type="radio"/> |
| Ferritin (ferr)                   | <input type="radio"/> | <input type="radio"/> | <input type="radio"/> | <input type="radio"/> |
| Kardiale Troponine (tnt)          | <input type="radio"/> | <input type="radio"/> | <input type="radio"/> | <input type="radio"/> |
| D-Dimer                           | <input type="radio"/> | <input type="radio"/> | <input type="radio"/> | <input type="radio"/> |

Weitere Patienten

155. Haben Sie noch einen weiteren Patienten mit einer SARS-CoV-2 Infektion behandelt?

- Ja  
 Nein

Abschluss & weitere Patienten

**Falls Sie uns die Daten von weiteren Patienten zur Verfügung stellen wollen, können Sie gerne Herrn Dr. Strumann ([c.strumann@uni-luebeck.de](mailto:c.strumann@uni-luebeck.de)) kontaktieren, um Alternativen der Datenübermittlung zu besprechen. Oder Sie schließen diese Befragung ab und starten danach erneut mit dem Ausfüllen des Fragebogens.**

**Vielen Dank für Ihre Teilnahme!**

156. Welcher Aspekt hat Ihnen bei dieser Befragung gefehlt?

Abschluss

**Vielen Dank für Ihre Teilnahme!**

157. Welcher Aspekt hat Ihnen bei dieser Befragung gefehlt?
